# Supplementary material for: Training for translation between disciplines: a philosophy for life and data sciences curricula
Source: Oxford University Press journal article supplement (doi:10.1093/bioinformatics/bty233), 2018-04-12
Supplement: bioinformatics_34_13_i4_s1.zip [file bioinformatics_34_13_i4_s1.zip]

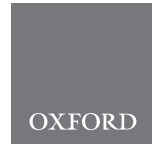

---

Bioinformatics Education

## **Supplement to – Training for translation between disciplines: a philosophy for life and data sciences curricula**

**K. Anton Feenstra<sup>\*</sup>, Sanne Abeln, Johan A. Westerhuis, Filipe Brancos dos Santos, Douwe Molenaar, Bas Teusink, Huub C. J. Hoefsloot and Jaap Heringa**

<sup>\*</sup> To whom correspondence should be addressed: k.a.feenstra@vu.nl.

### **Abstract**

---
